# Supplementary material for: Environmentally friendly approach to α-acyloxy carboxamides via a chemoenzymatic cascade
Source: Royal Society of Chemistry journal article supplement (doi:10.1039/c6ra13078j), 2016-01-01
Supplement: c6ra13078j1.pdf [file c6ra13078j1.pdf]

Supporting Information for

## Environmentally Friendly Approach to $\alpha$ -Acyloxy carboxamides *via* a Chemoenzymatic Cascade

Daniel Paprocki,<sup>a</sup> Dominik Koszelewski,<sup>a</sup> Anna Źądło,<sup>a</sup> Peter Walde<sup>b</sup> and Ryszard Ostaszewski<sup>\*a</sup>

<sup>a</sup> Institute of Organic Chemistry, Polish Academy of Sciences, Kasprzaka 44/52, 01-224 Warsaw, Poland. E-mail: ryszard.ostaszewski@icho.edu.pl

<sup>b</sup> Laboratory of Polymer Chemistry, Department of Materials, ETH Zurich, Vladimir-Prelog-Weg 5, 8093 Zurich, Switzerland

### Synthesis of *N*-(4-methoxybenzyl)formamide:

Reaction conditions: 4-methoxybenzyl amine (30 mmol; 3.8 ml) and ethyl formate (12.5 ml) were heated under reflux overnight. After cooling the reaction mixture to room temperature, 5 ml hexane were added. The precipitate was filtered and washed with hexane. Yield 78 % (3.86 g).

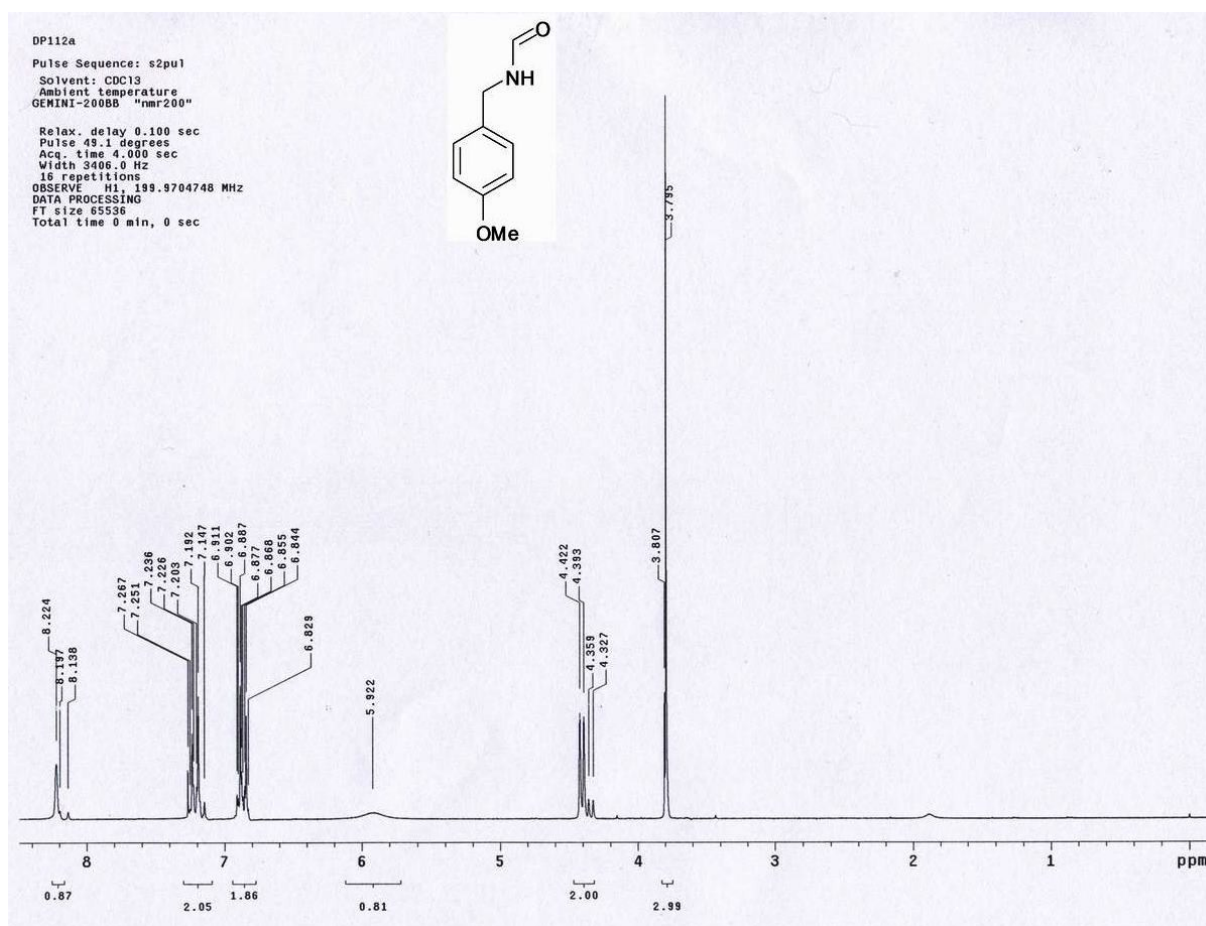

Figure S1. <sup>1</sup>H NMR spectrum of *N*-(4-methoxybenzyl)formamide (200 MHz, CDCl<sub>3</sub>).

### Synthesis of *p*-methoxybenzyl isocyanide (**4a**):

Reaction conditions: To a solution of *N*-(4-methoxybenzyl)formamide (16 mmol; 2.64 g) and triethylamine (48 mmol; 6.7 ml) in dry dichloromethane (20 ml) at  $-78^{\circ}\text{C}$  phosphoryl oxychloride (20 mmol; 1.85 ml) was added dropwise. After 1 h of stirring at room temperature, the reaction mixture was quenched by adding a saturated solution of  $\text{NaHCO}_3$  (20 mL), then extracted with dichloromethane ( $2 \times 20$  mL). The combined organic layers were dried with  $\text{MgSO}_4$  and residuals of solvent were distilled under reduced pressure. The crude product was purified by column chromatography on silica gel using hexane/AcOEt as an eluent. Yield 80 % (1.88 g).

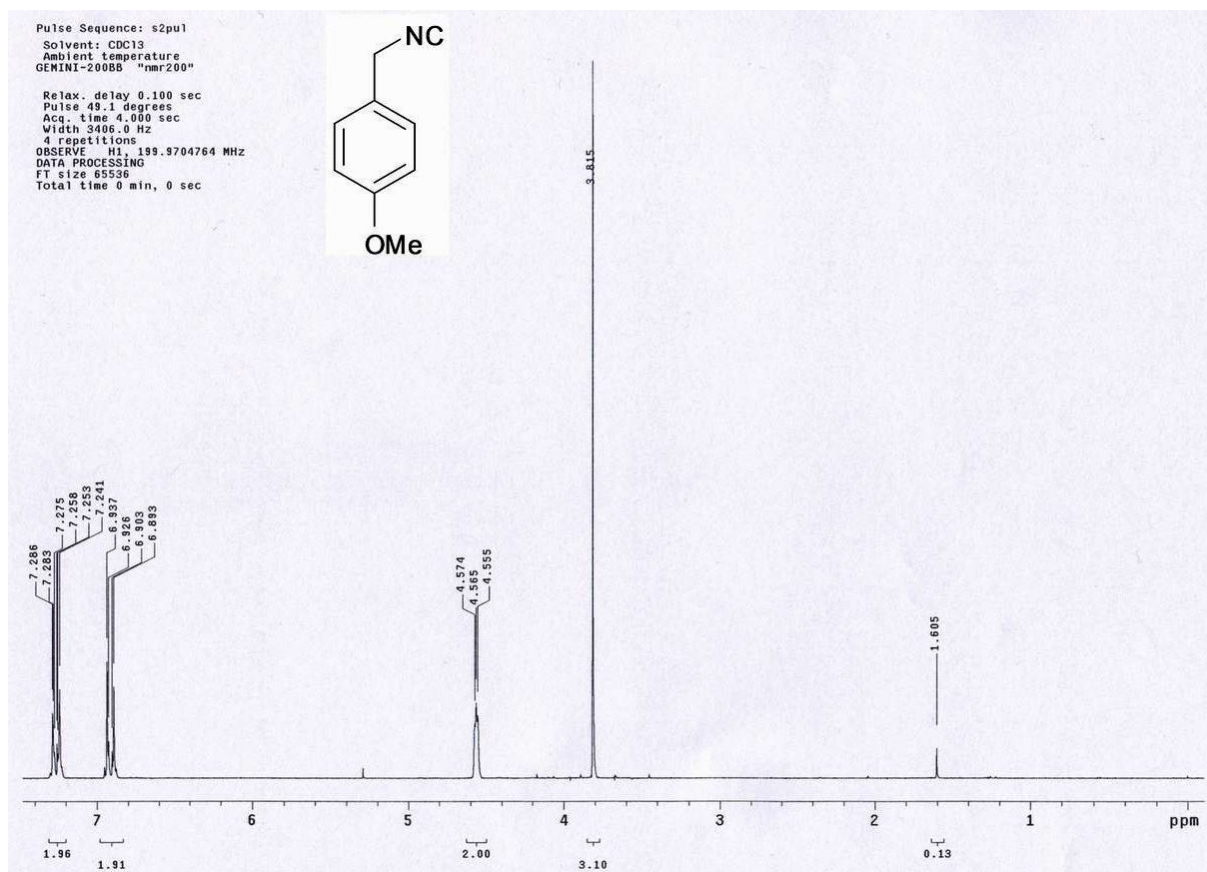

Figure S2.  $^1\text{H}$  NMR spectrum of compound **4a** (200 MHz,  $\text{CDCl}_3$ ).

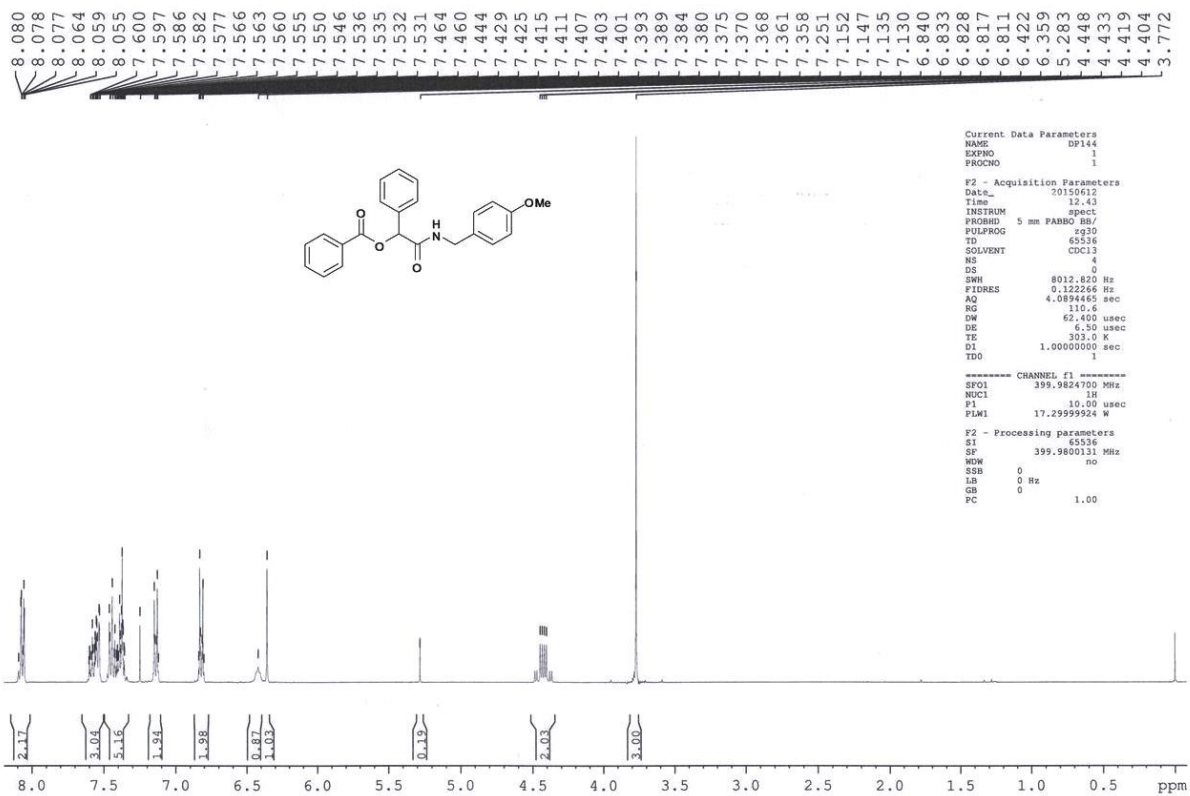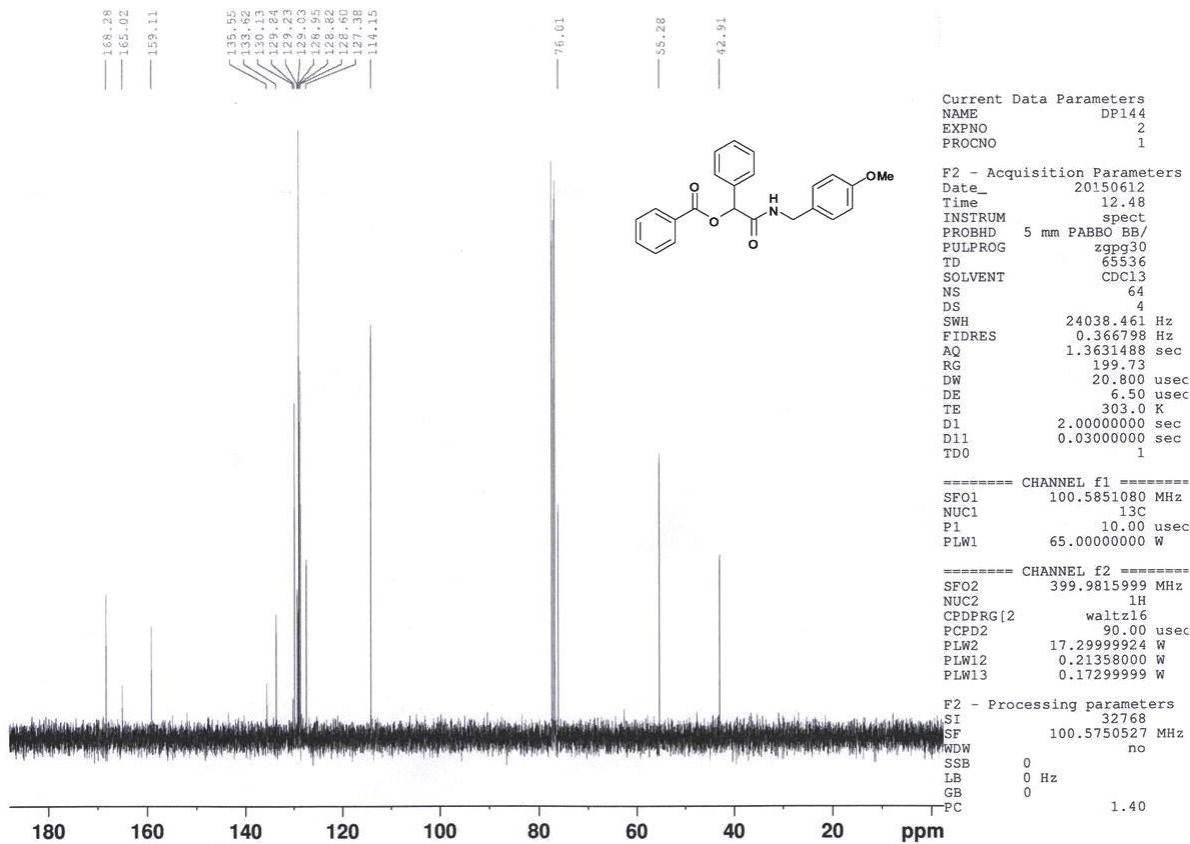

Figure S3.  $^1\text{H}$  NMR (above) and  $^{13}\text{C}$  NMR (below) spectra of compound 5a (400 MHz,  $\text{CDCl}_3$ ).

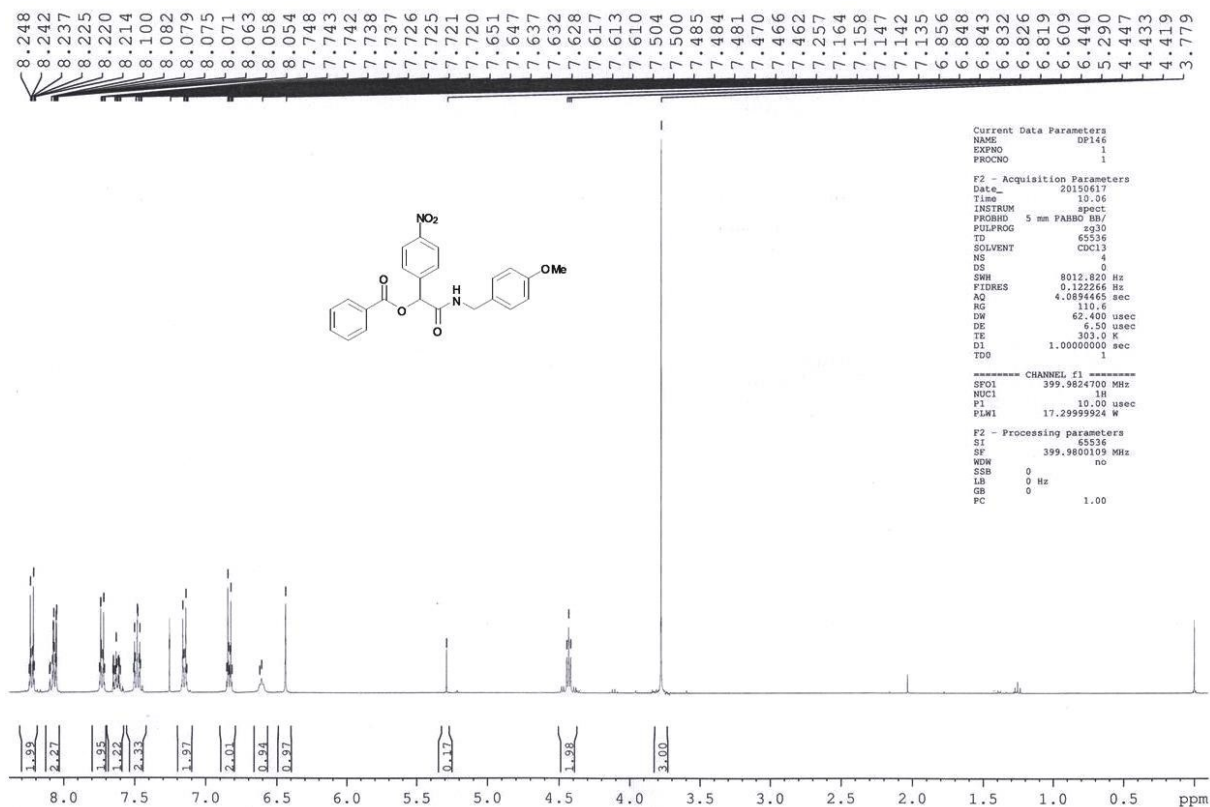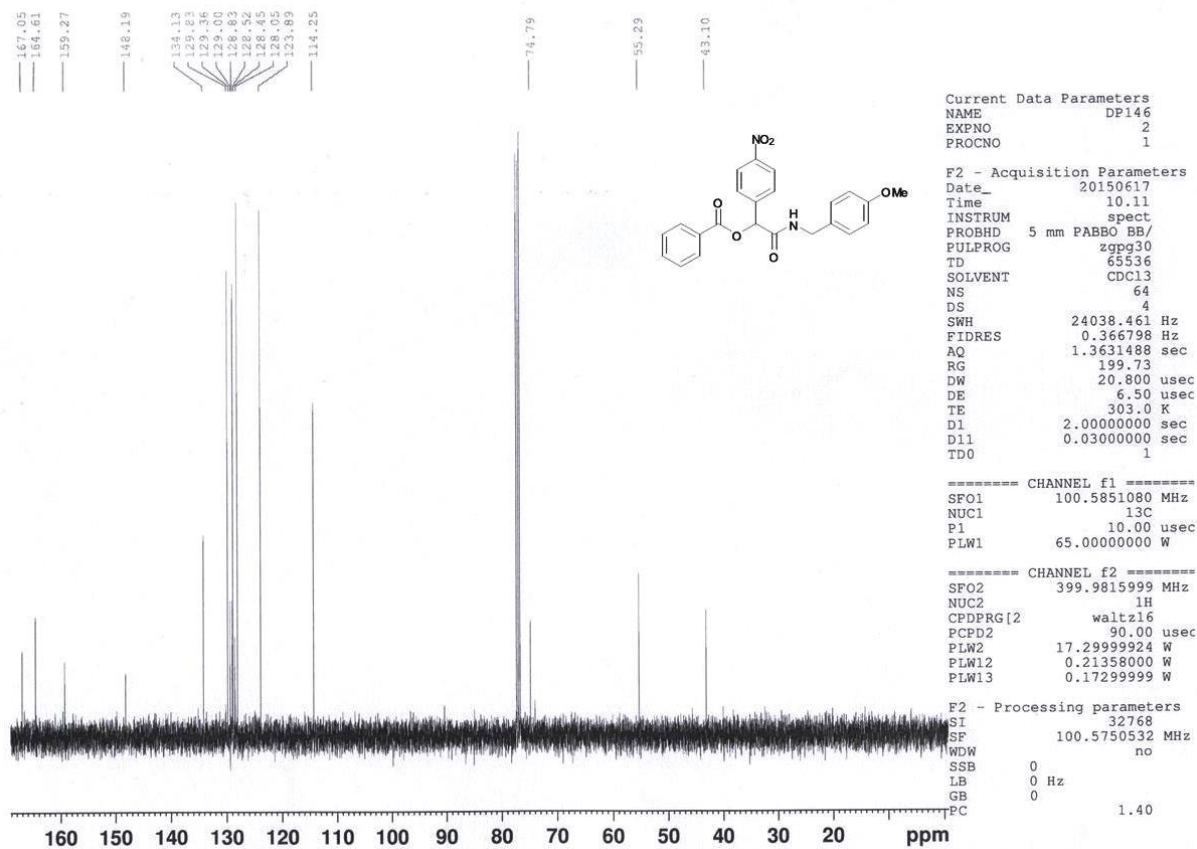

Figure S4.  $^1\text{H}$  NMR (above) and  $^{13}\text{C}$  NMR (below) spectra of compound **5b** (400 MHz,  $\text{CDCl}_3$ ).



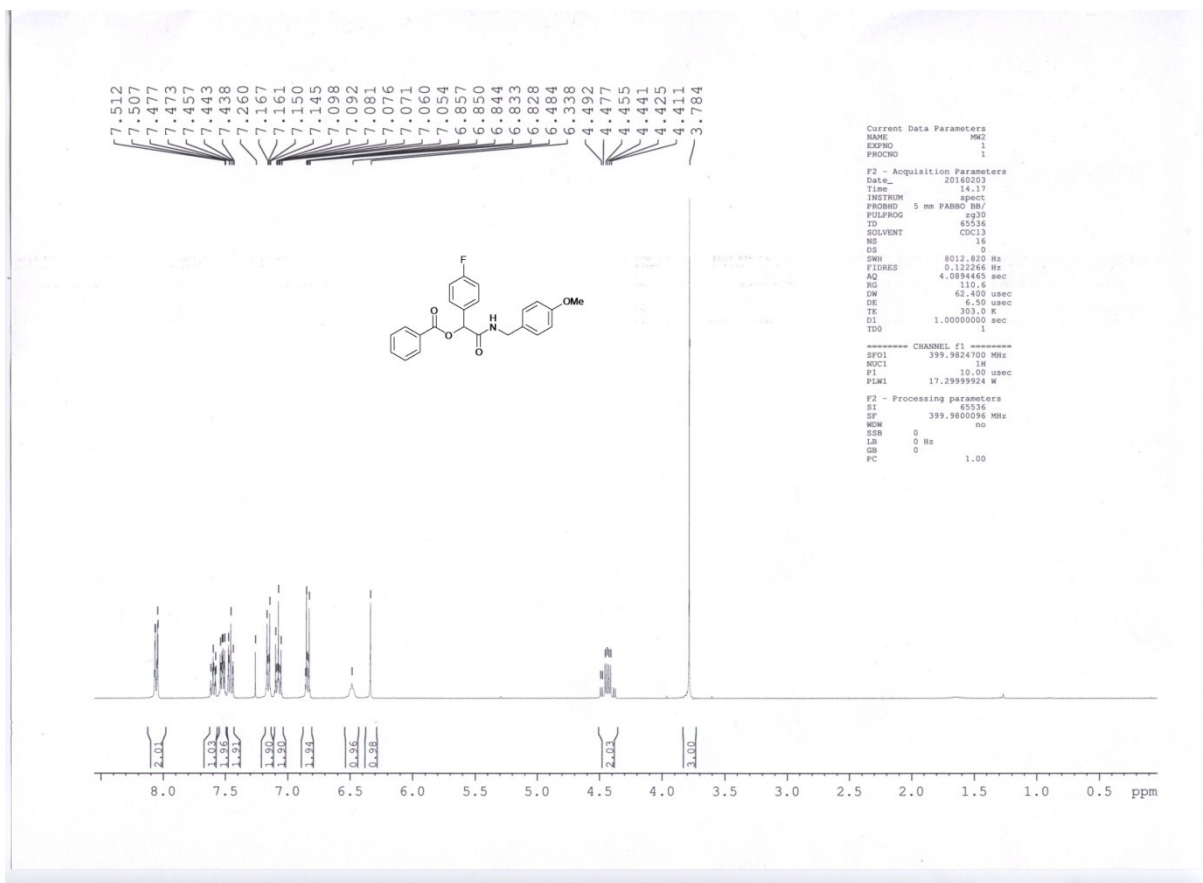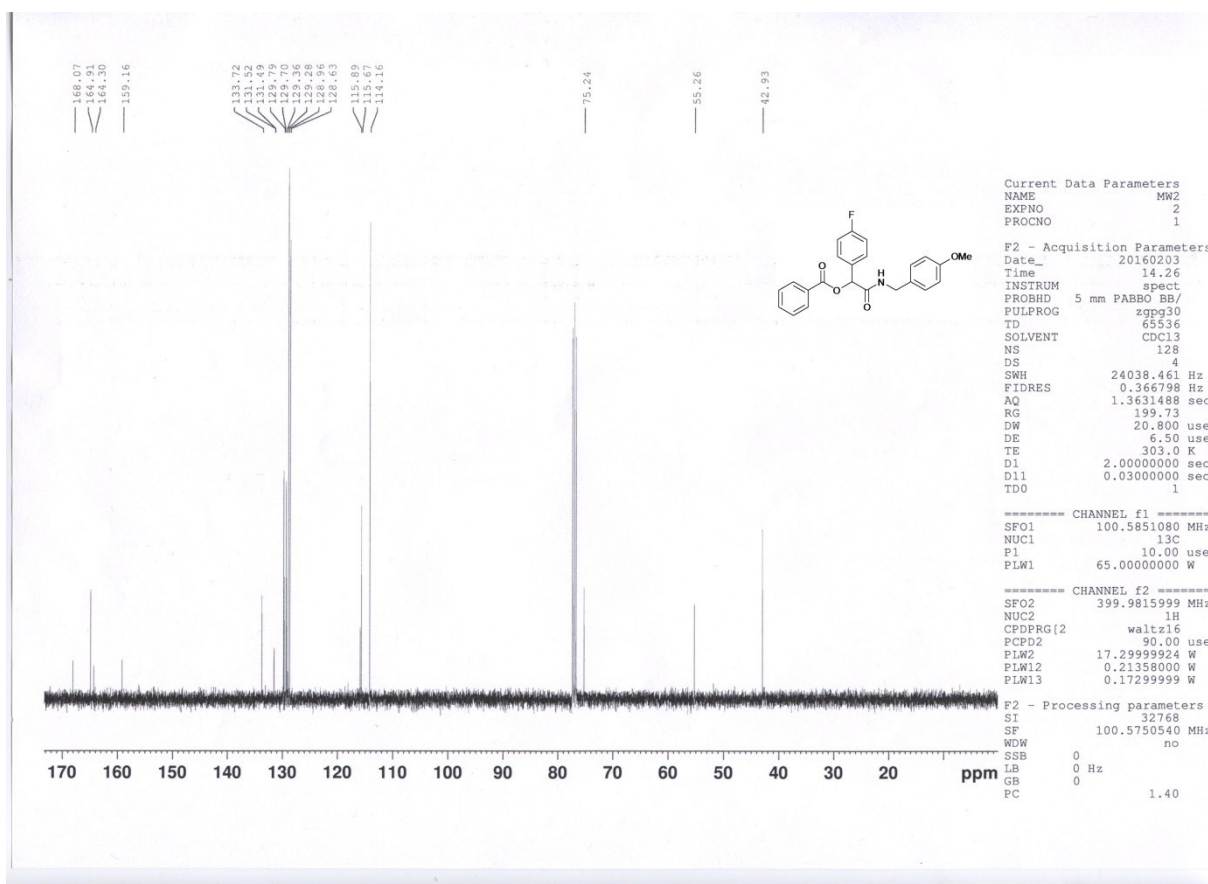

Figure S5.  $^1\text{H}$  NMR (above) and  $^{13}\text{C}$  NMR (below) spectra of compound 5c (400 MHz,  $\text{CDCl}_3$ ).

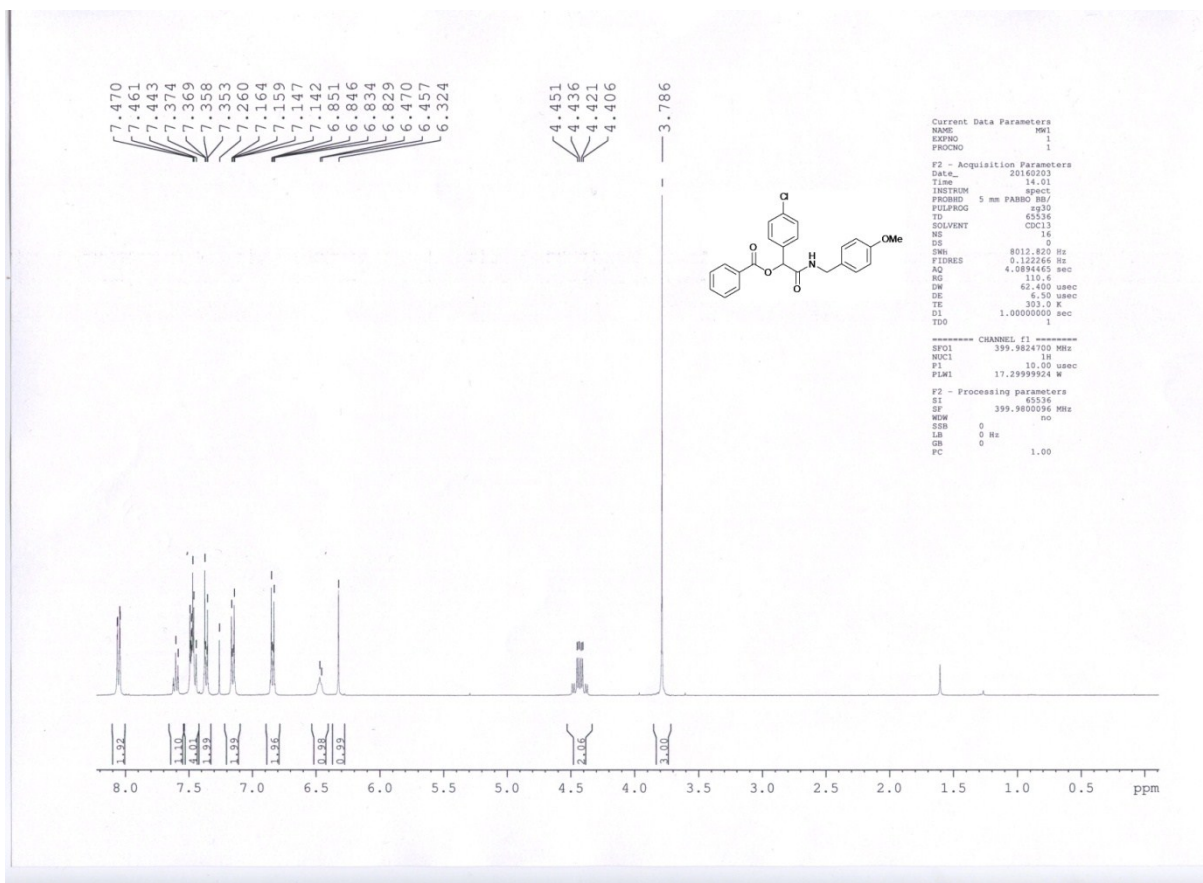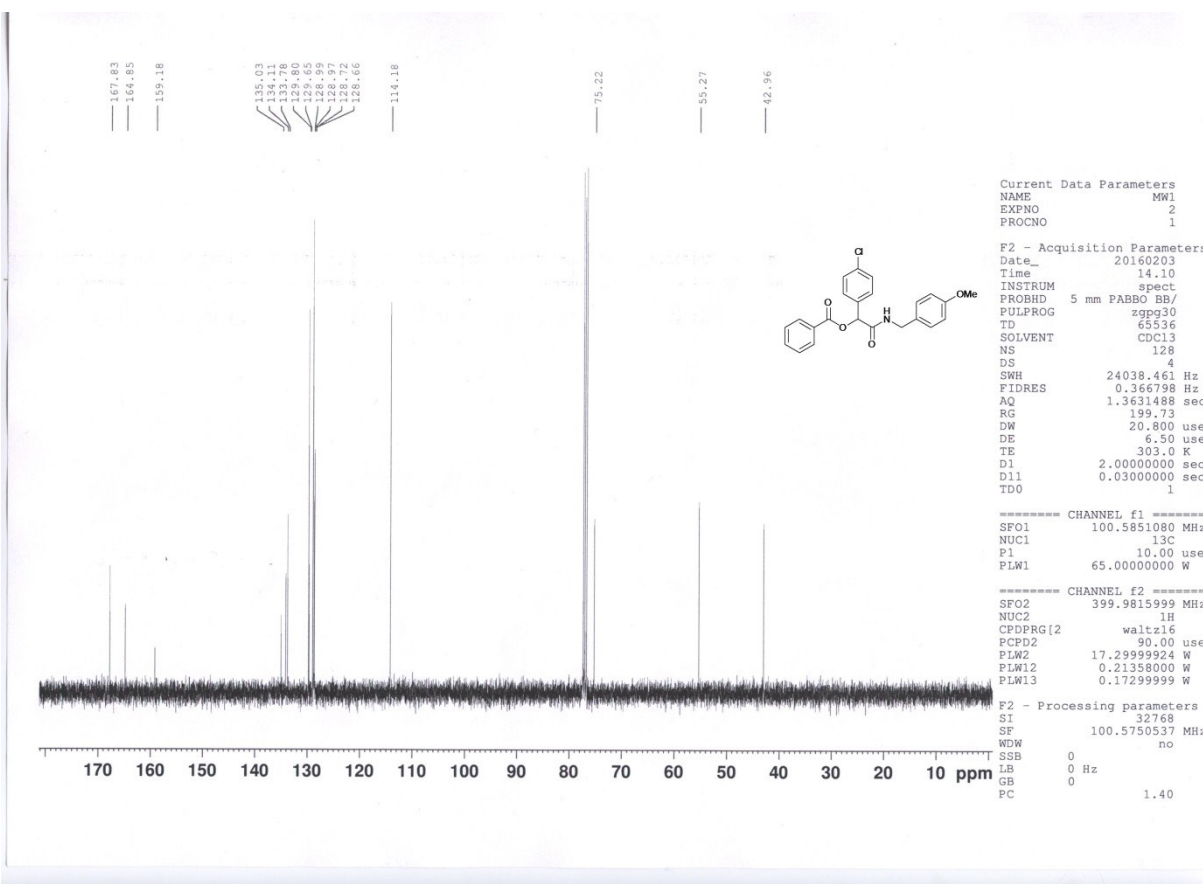

Figure S6.  $^1\text{H}$  NMR (above) and  $^{13}\text{C}$  NMR (below) spectra of compound 5d (400 MHz,  $\text{CDCl}_3$ ).

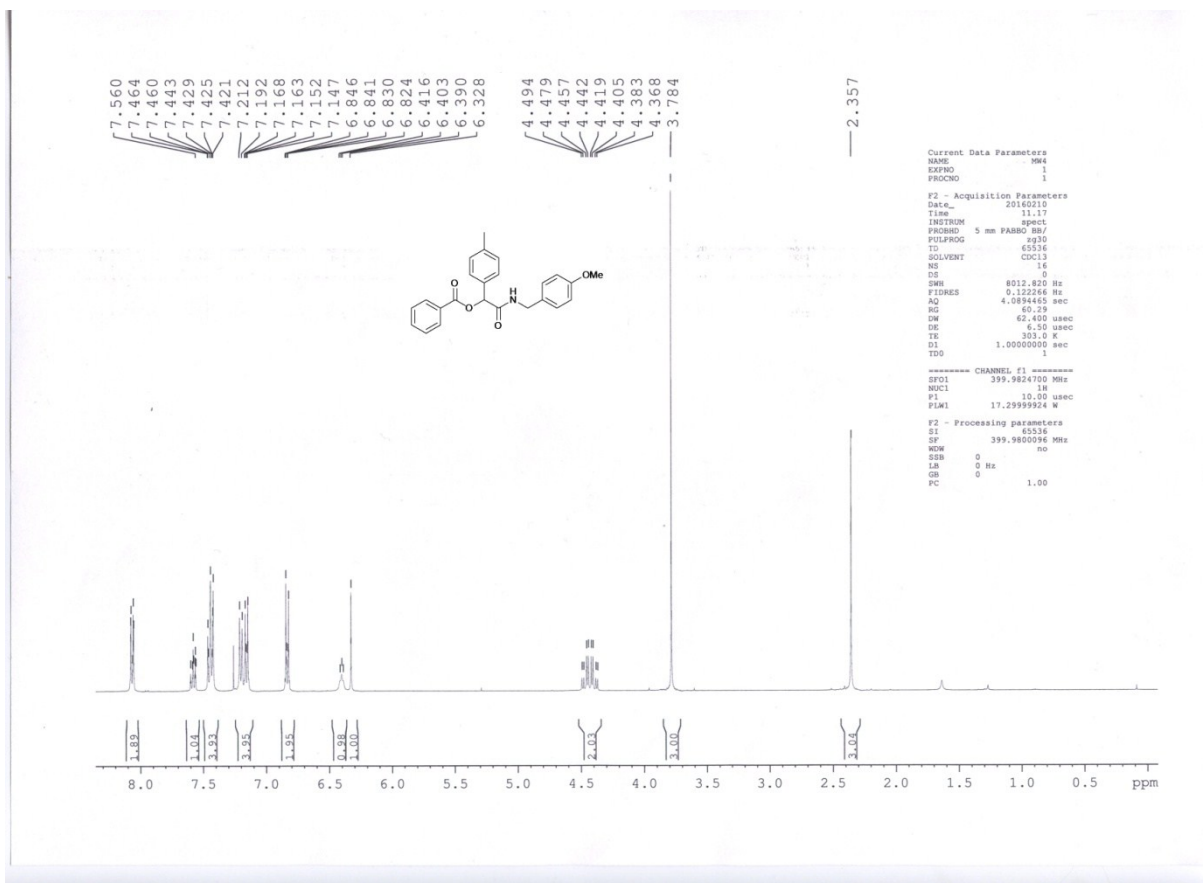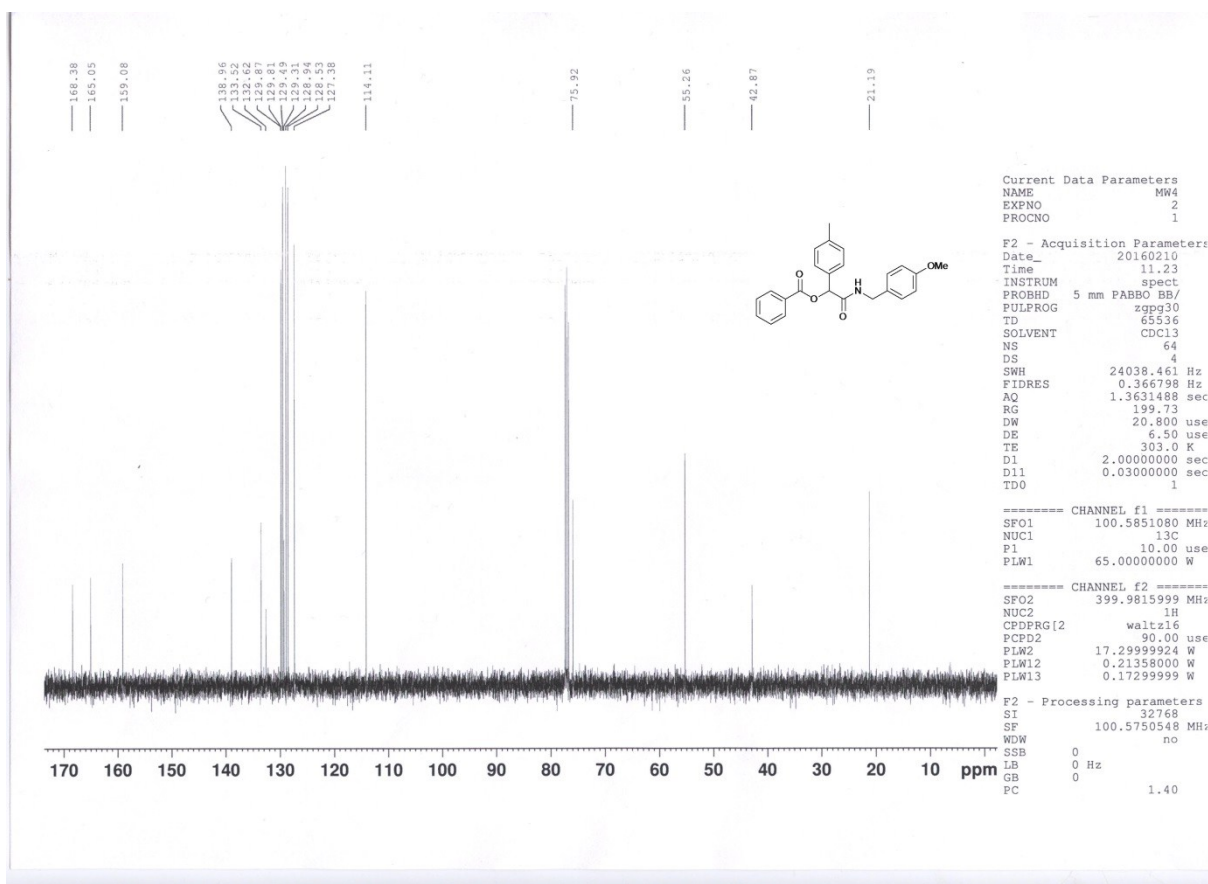

Figure S7. <sup>1</sup>H NMR (above) and <sup>13</sup>C NMR (below) spectra of compound 5e (400 MHz, CDCl<sub>3</sub>).

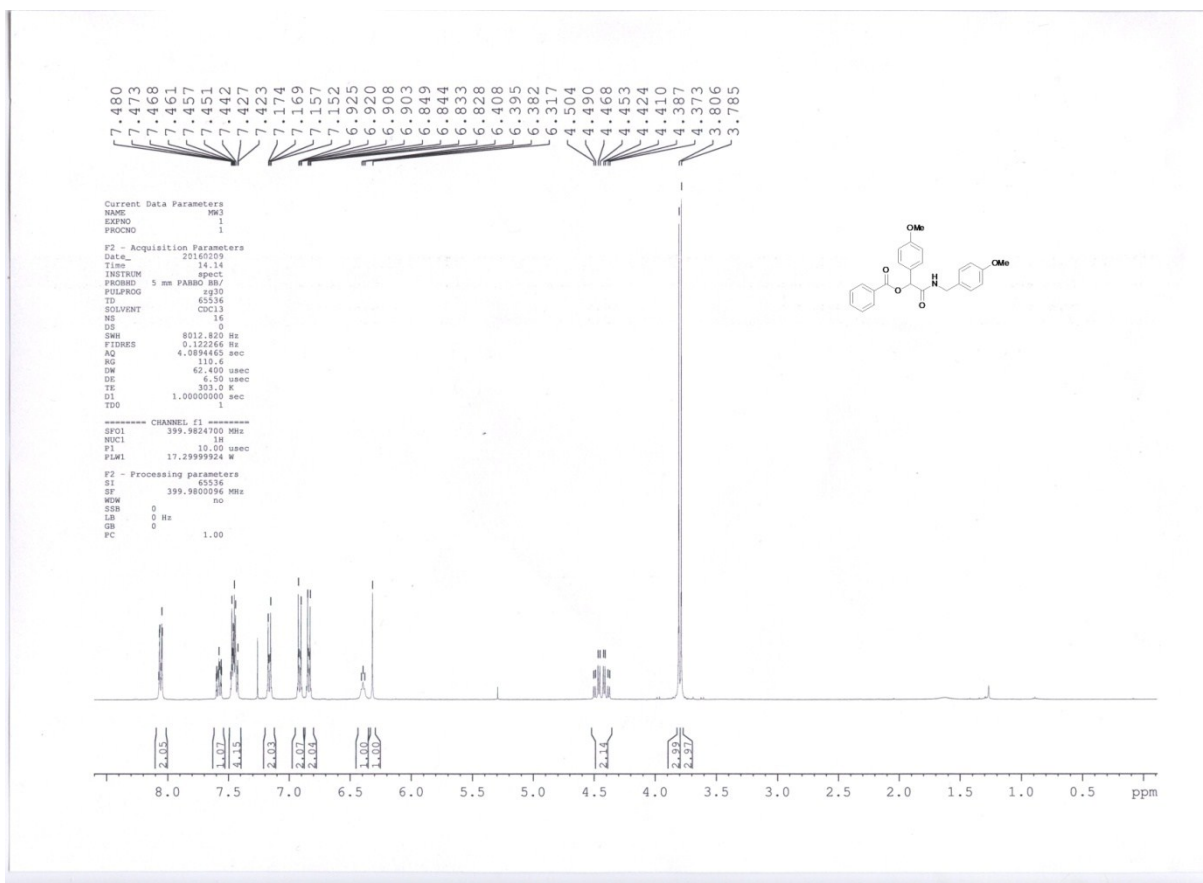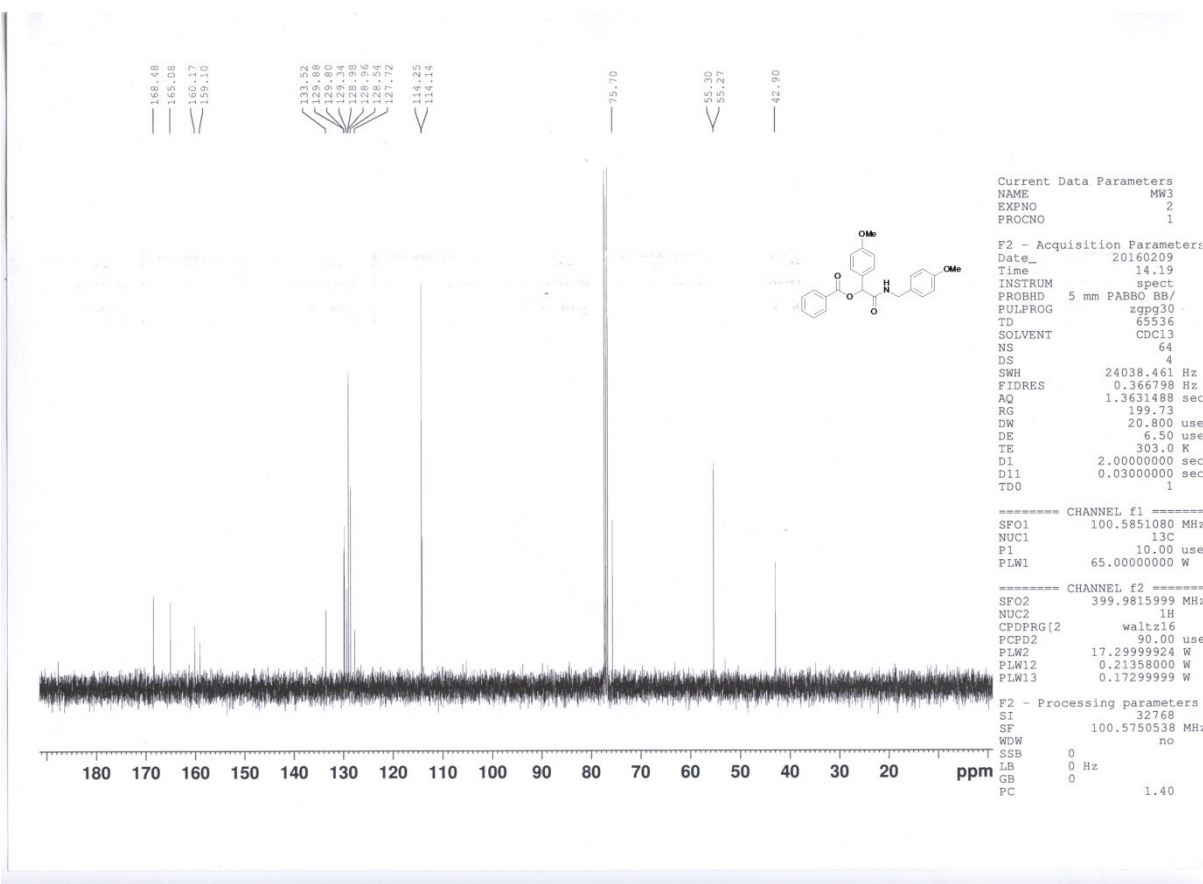

Figure S8. <sup>1</sup>H NMR (above) and <sup>13</sup>C NMR (below) spectra of compound 5f (400 MHz, CDCl<sub>3</sub>).



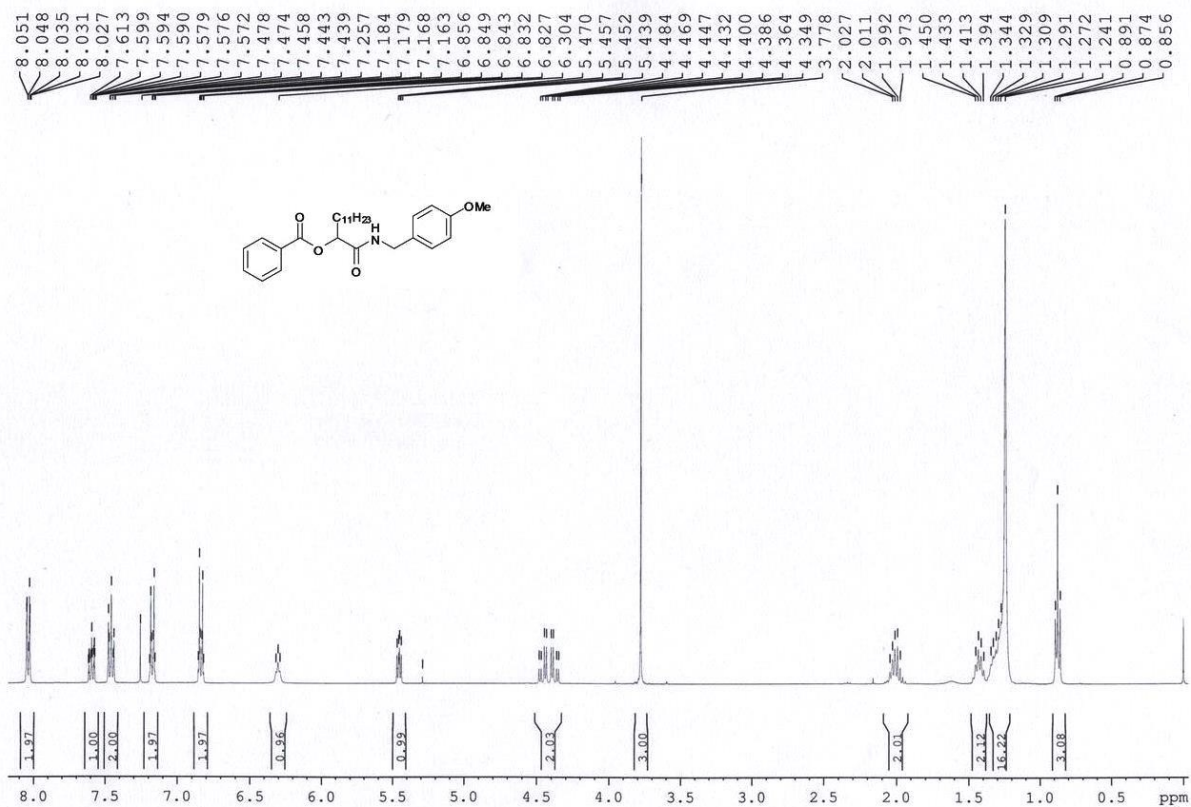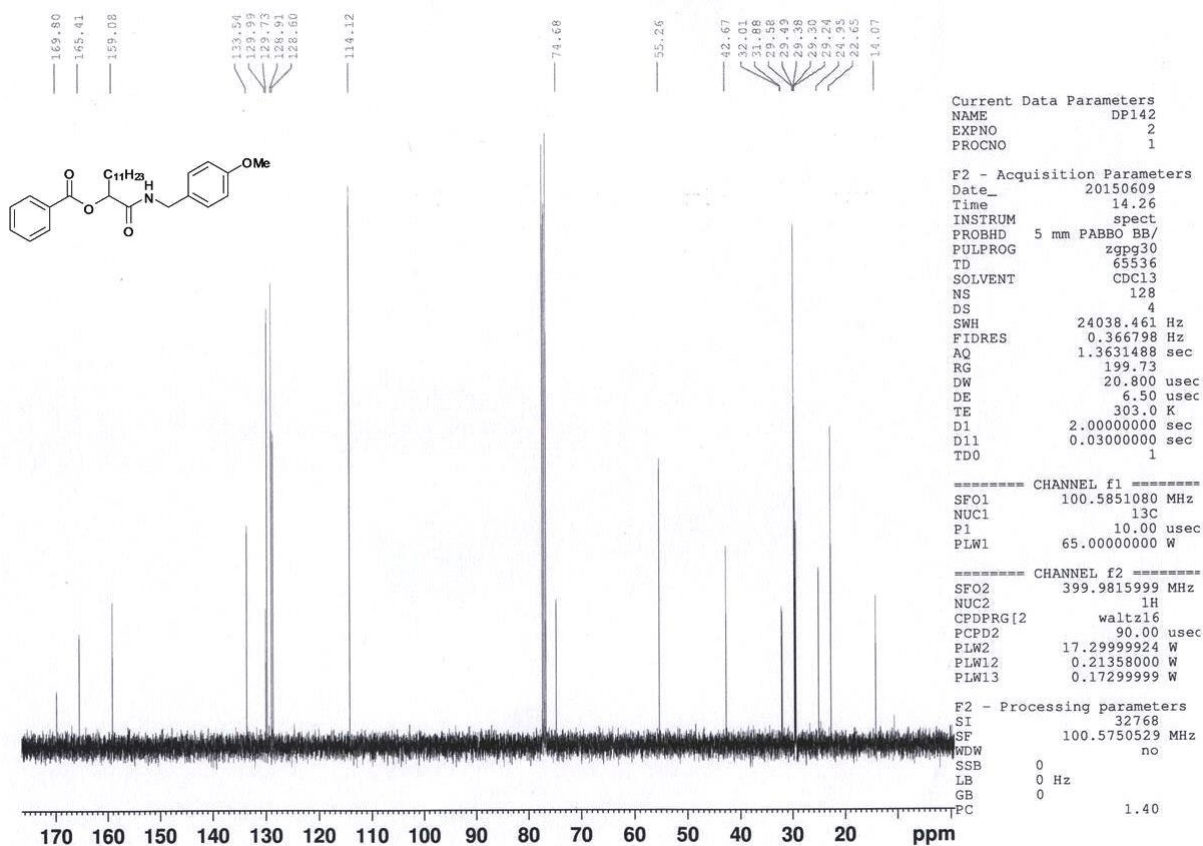

Figure S9. <sup>1</sup>H NMR (above) and <sup>13</sup>C NMR (below) spectra of compound 5g (400 MHz, CDCl<sub>3</sub>).

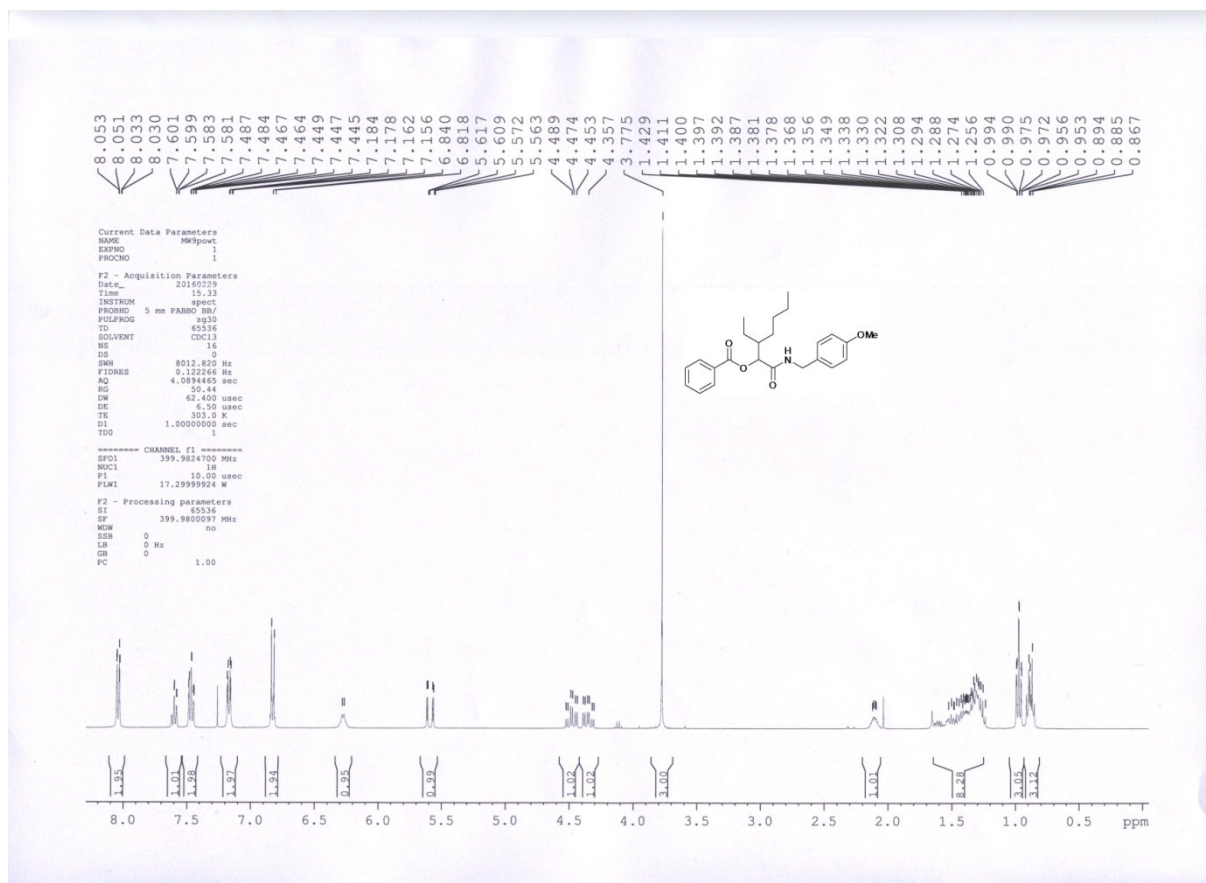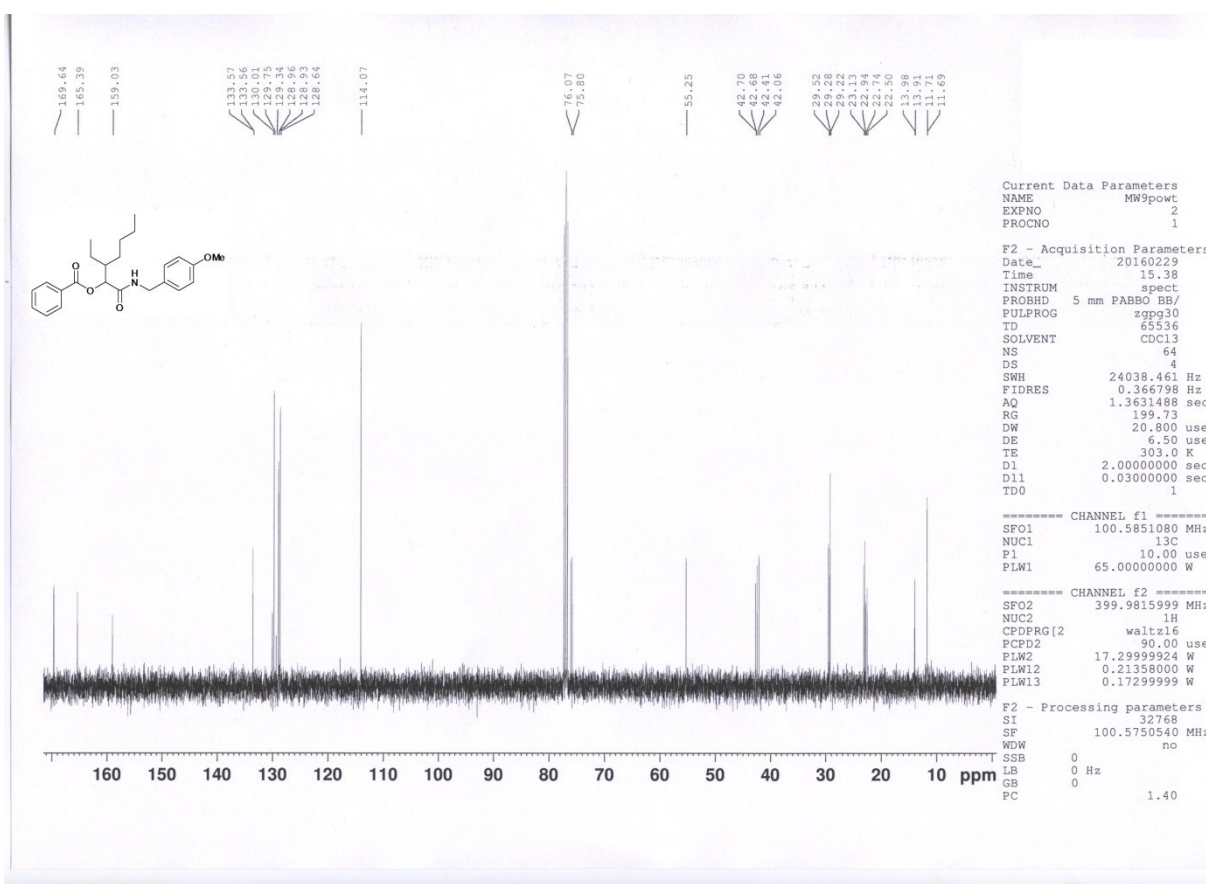

Figure S10.  $^1\text{H}$  NMR (above) and  $^{13}\text{C}$  NMR (below) spectra of compound **5h** (400 MHz,  $\text{CDCl}_3$ ).

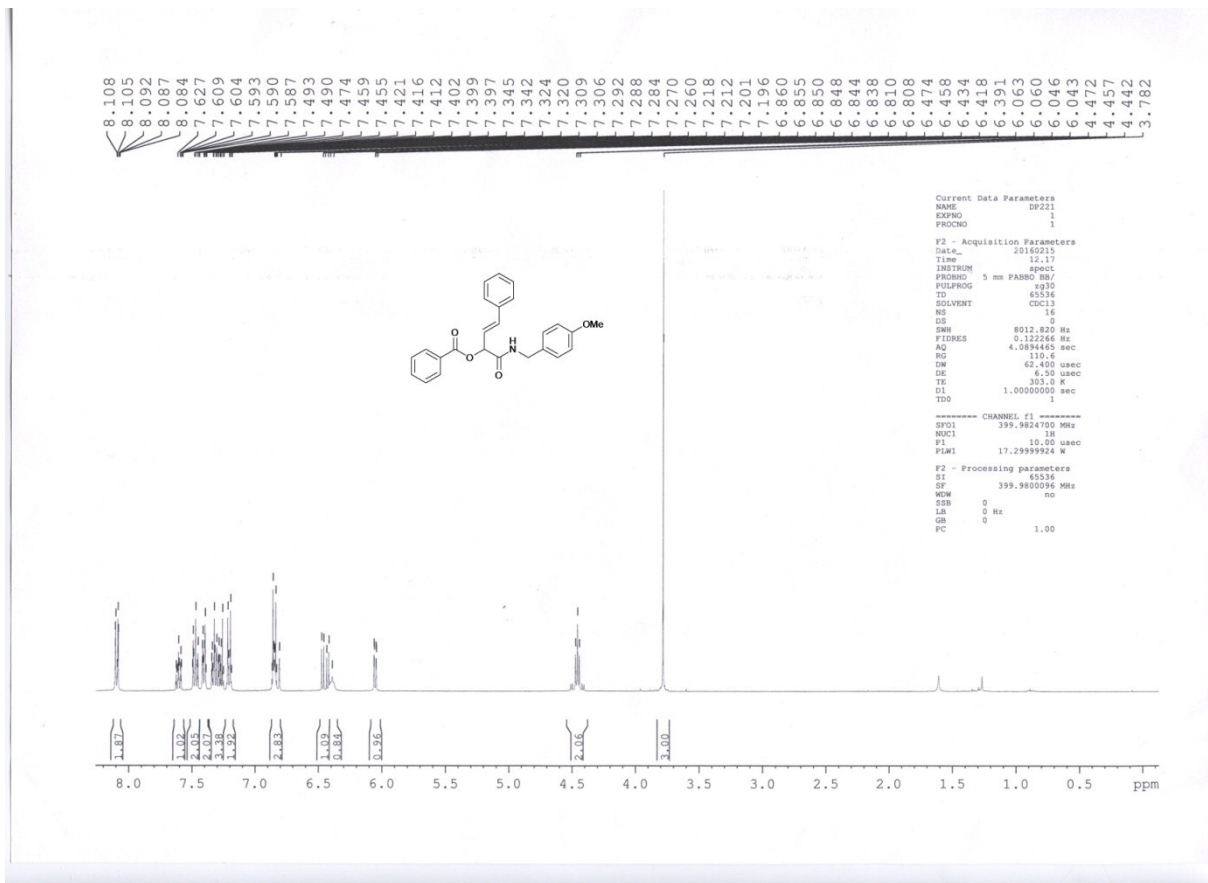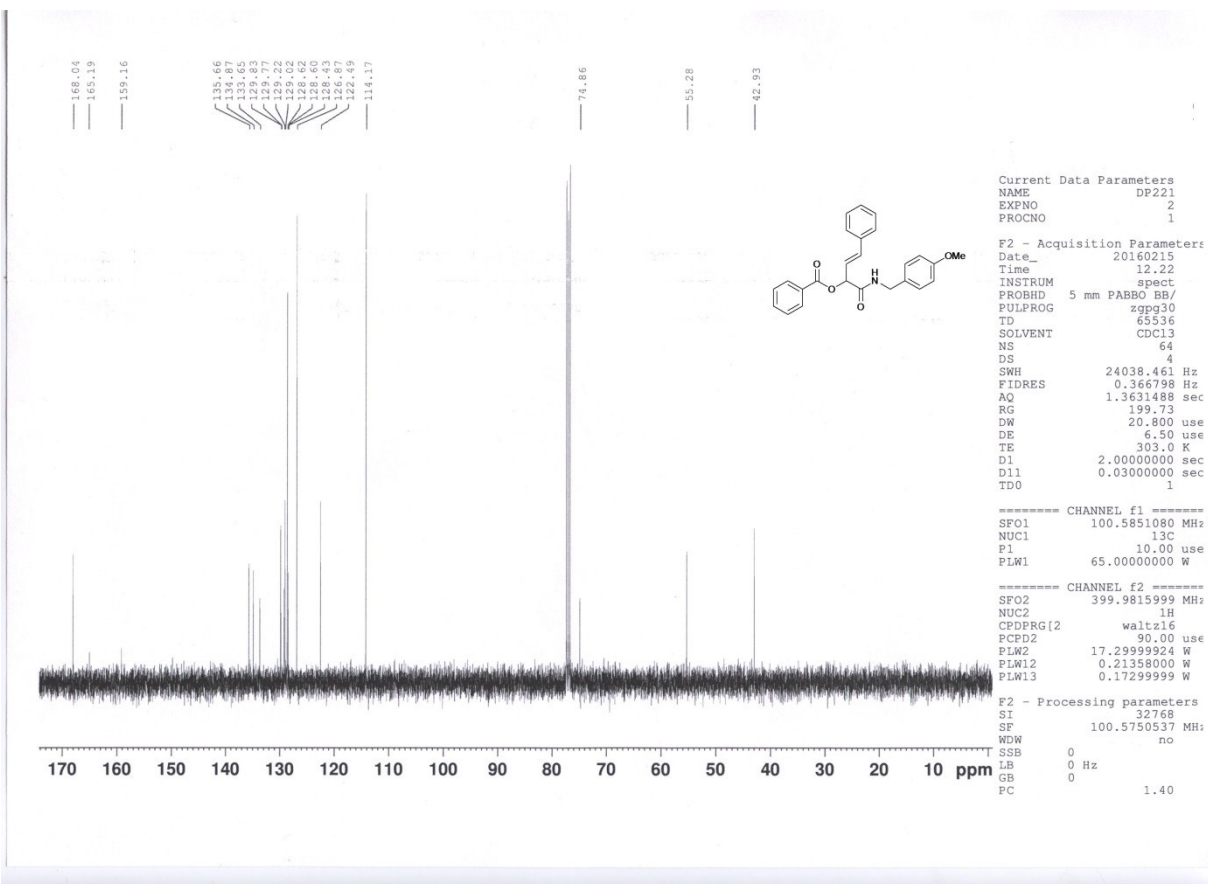

Figure S11. <sup>1</sup>H NMR (above) and <sup>13</sup>C NMR (below) spectra of compound 5i (400 MHz, CDCl<sub>3</sub>).
